# Supplementary material for: Sentinel Surveillance of Influenza-Like Illness in Two Hospitals in Maracay, Venezuela: 2006–2010
Source: PLoS One. 2012 Sep 11;7(9):e44511. doi: 10.1371/journal.pone.0044511 (PMC3439372; doi:10.1371/journal.pone.0044511)
Supplement: Table S1 — Genbank accession numbers of DNA sequences from 27 Influenza viruses isolated in two health centers of Maracay, Venezuela: October 2006–December 2010. (XLS) [file pone.0044511.s001.xls]

## Sheet: Sheet1
NAMRU-6 Code	Genbank-Accession Number	Bankit Number
FLU9869	EU555276	1067586
FLU9870	EU555277	1067587
FLU6199	EU522037	1063559
FLU9868	JQ906833	1528532
FLA5618	JQ906834	1528532
FLA4338	JQ906835	1528532
FLA1234	JQ906836	1528532
FLA2639	JQ906837	1528532
FLA2645	JQ906838	1528532
FLU5243	JQ906839	1528532
FLA1228	JQ906840	1528532
FLA2650	JQ906841	1528532
FLA4341	JQ906842	1528532
FLA4342	JQ906843	1528532
FLE2524	JQ906844	1528532
FLE2525	JQ906845	1528532
FLU7817	JQ906846	1528532
FLU7813	JQ906847	1528532
FLU6211	JQ906848	1528532
FLU6219	EU521907	1528532
FLA6594	JQ906849	1528532
FLA6553	JQ906850	1528532
FLA6546	JQ906851	1528532
FLA5610	JQ906852	1528532
FLU9873	JQ914824	1528995
FLU7827	JQ914822	1528995
IVE00080	JQ914823	1528995
